# Supplementary material
Source: publisher figshare collection journal article supplement (https://acs.figshare.com/ndownloader/files/23091950)
Supplement: Supplementary file 1 [file 23091950]

**Supporting Information for:**  
**Antimicrobial Dye-Conjugated Polyglobalide-Based Organogels**

*Jason V. Rowley,<sup>†</sup> Patrick Wall,<sup>†</sup> Huayang Yu,<sup>†</sup> Giuseppe Tronci,<sup>‡§</sup> Deirdre A.*

*Devine,<sup>||</sup> Jonathan J. Vernon<sup>||</sup> and Paul D. Thornton<sup>†\*</sup>*

<sup>†</sup>School of Chemistry, <sup>§</sup>Clothworkers' Centre for Textile Materials Innovation for

Healthcare, School of Design, <sup>||</sup>Division of Oral Biology, School of Dentistry,

University of Leeds, Leeds LS2 9JT, U.K. <sup>‡</sup>Biomaterials and Tissue Engineering

Research Group, School of Dentistry, St. James's University Hospital, University of

Leeds, Leeds LS9 7TF, U.K.

\* P.D.Thornton@leeds.ac.uk

**Materials, equipment and settings**

All chemicals used were purchased from Sigma-Aldrich and used as received unless otherwise stated. Globalide was received from Symrise and used as received. 3-Mercaptopropionic acid was purchased from Alfa Aesar and used as received. Advanced Polymer Chromatography (APC) was conducted on a Waters Acquity APC system using an Acquity column (Acquity APC TM 200 2.5 µm, 4.5 x 150 mm). The

APC instrument was calibrated against standard poly(methyl methacrylate) samples in tetrahydrofuran (THF). Differential Scanning Calorimetry (DSC) curves were collected using a TA Instruments DSC Q20 instrument with a heating rate of 10 °C min<sup>-1</sup> and an inert gas flow of N<sub>2</sub> at a rate of 50 mL min<sup>-1</sup>. FTIR spectra were recorded on a Perkin Elmer Spectrum One spectrometer equipped with a Specac Golden Gate Attenuated Total Reflectance attachment. Nuclear magnetic resonance (NMR) spectra were recorded on a Bruker AVANCE III HD-400 spectrometer; chemical shifts were referenced to trimethylsilane at 0 ppm. Rheological data were obtained on a TA Instruments AR1500ex rheometer fitted with a 40 mm 3° steel cone and operating an oscillation procedure at 25 °C. Scanning Electron Microscopy (SEM) samples were prepared on conductive tape and sputter-coated with a thin layer of gold in a Quorum Q150RS sputter-coater. Images were then collected using a Jeol JSM-6610LV instrument and analyzed on ImageJ. UV-vis spectroscopic analyses were conducted using a Varian Cary 50 UV-visible spectrophotometer with quartz cuvettes.

### **Supplementary figures**

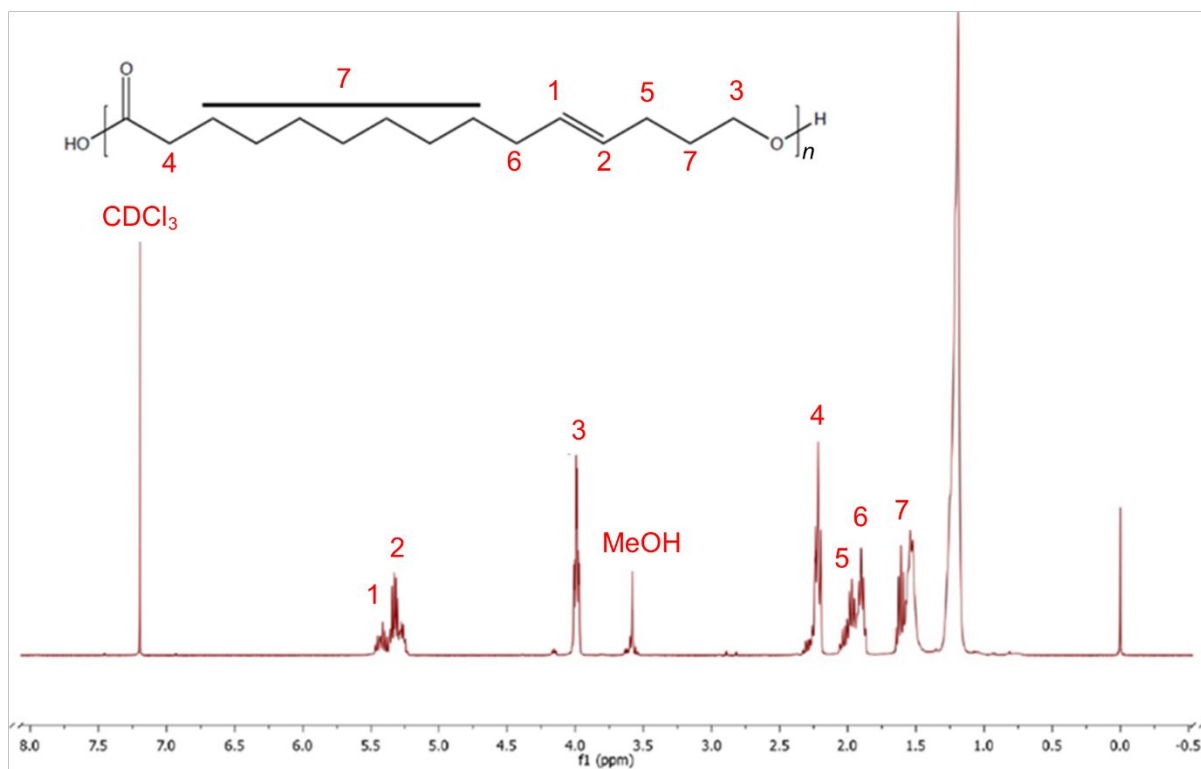

**Figure S1.**  $^1\text{H}$  NMR spectrum of PGI (400 MHz,  $\text{CDCl}_3$ ).

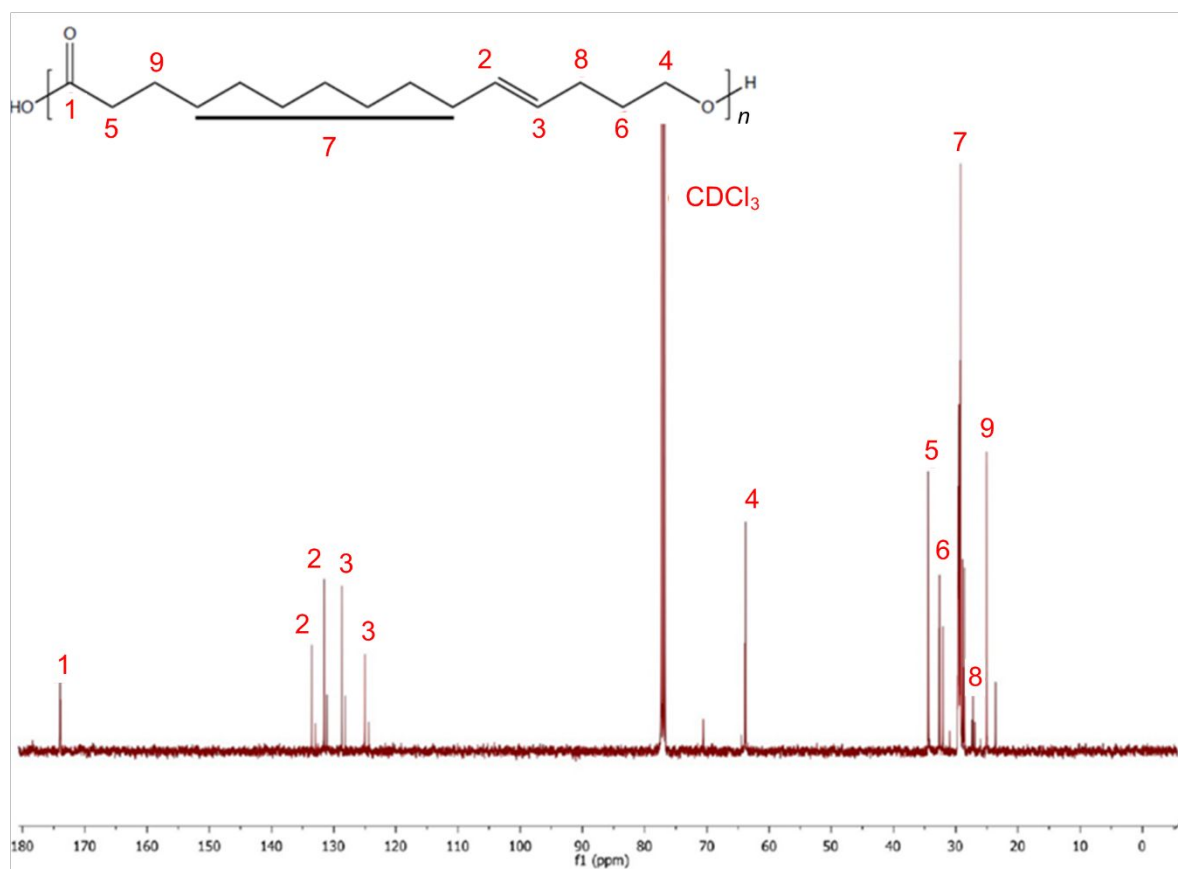

**Figure S2.**  $^{13}\text{C}$  NMR spectrum of PGI (100 MHz,  $\text{CDCl}_3$ ).

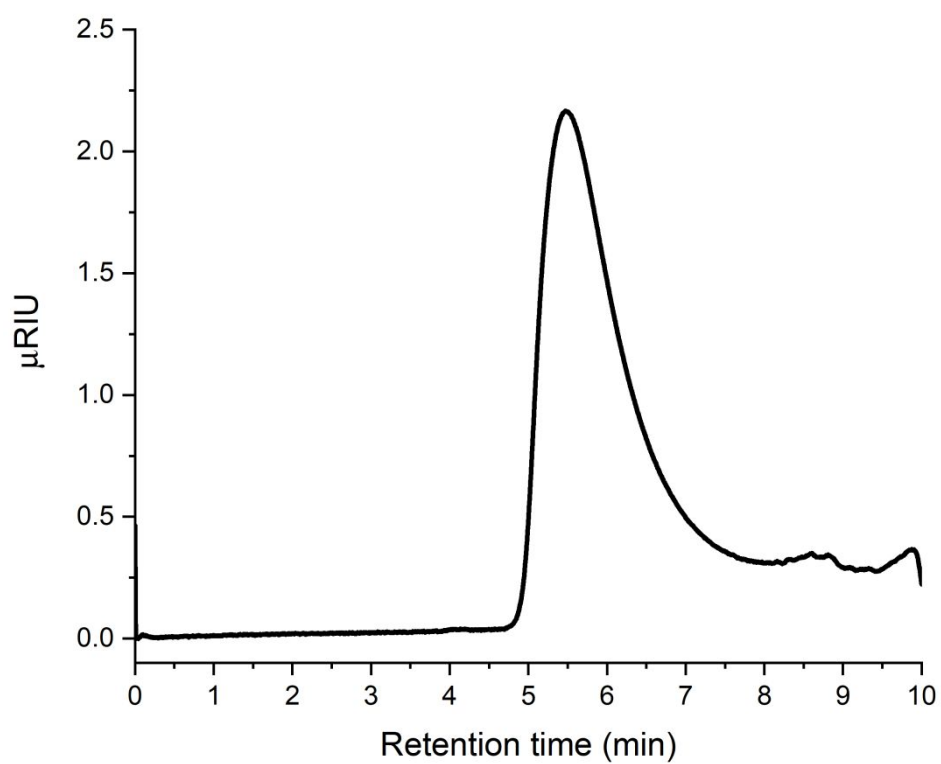

**Figure S3.** APC chromatogram of PGL.

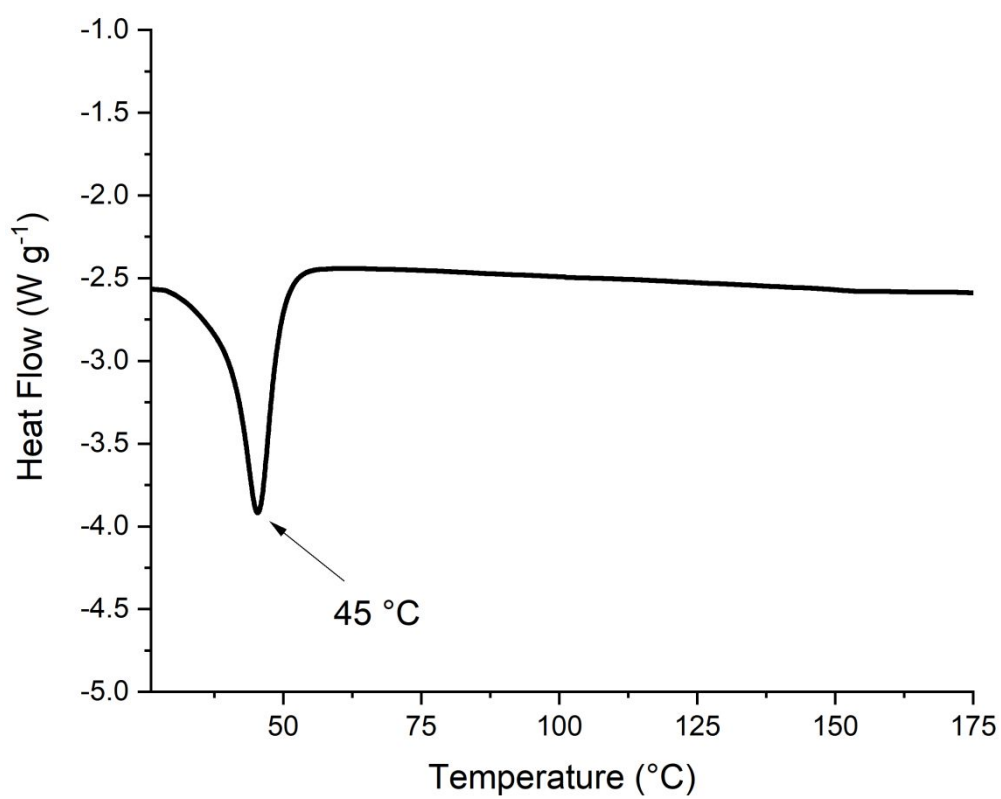

**Figure S4.** DSC thermogram for PGL.

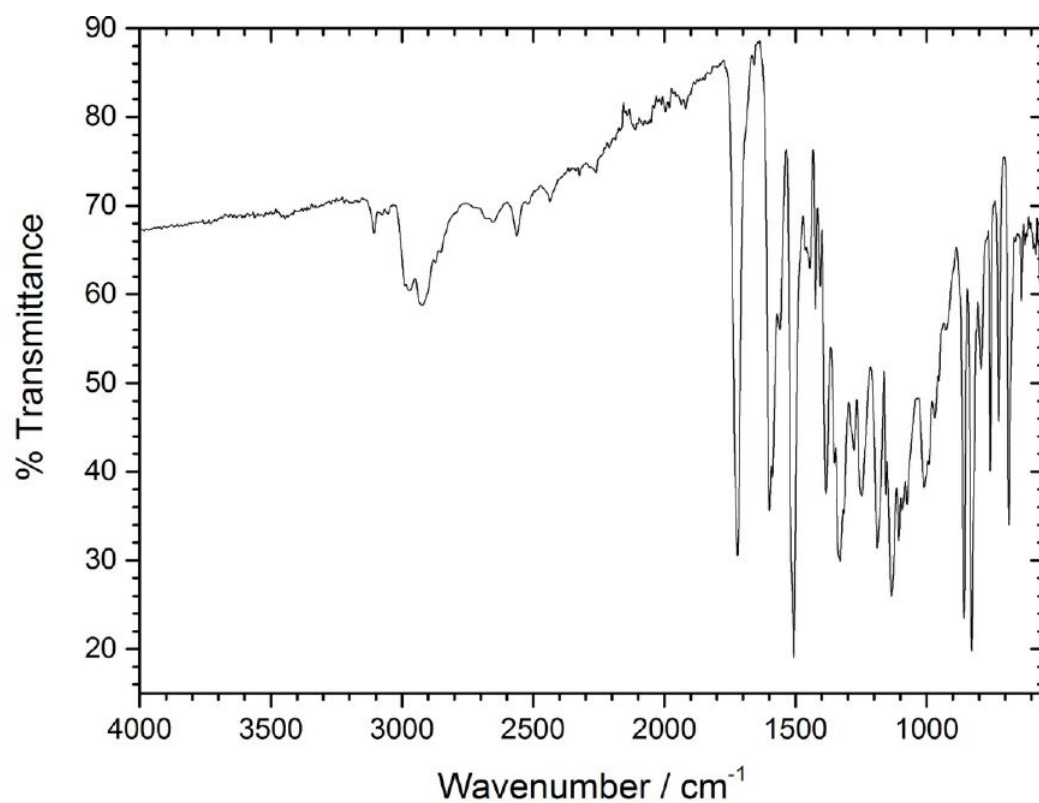

**Figure S5.** FTIR spectrum corresponding to DR1 3-mercaptopropionate.

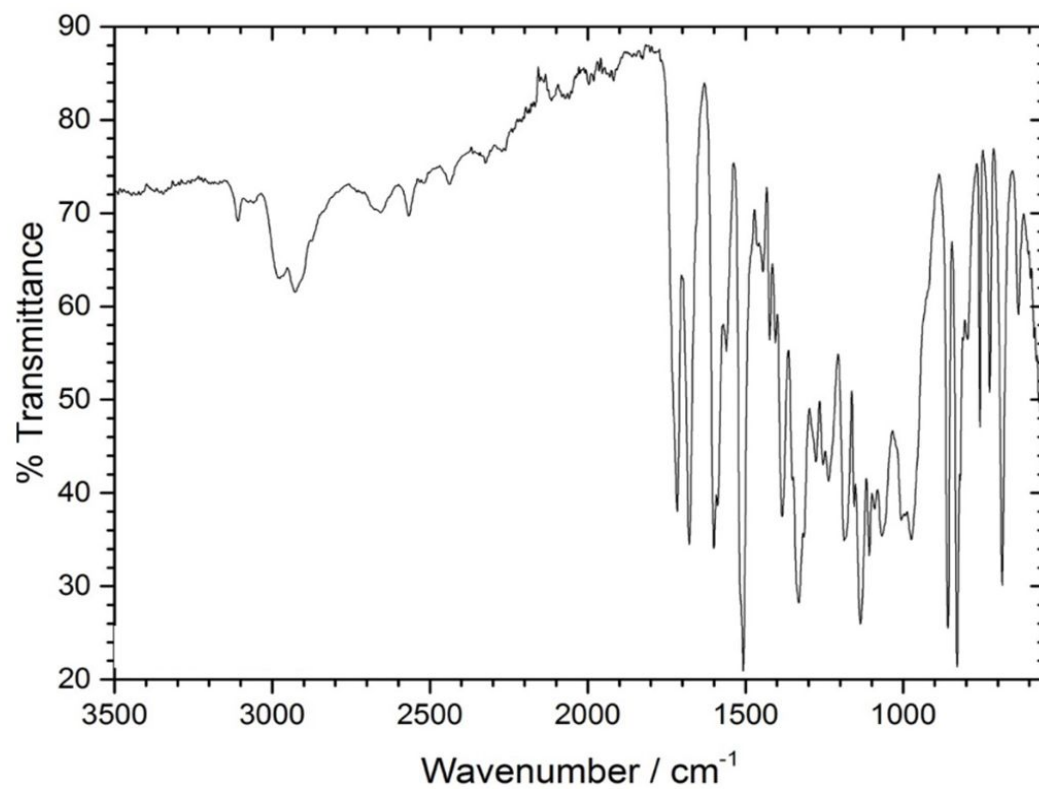

**Figure S6.** FTIR spectrum corresponding to DR1 bis(3-mercaptopropionate).

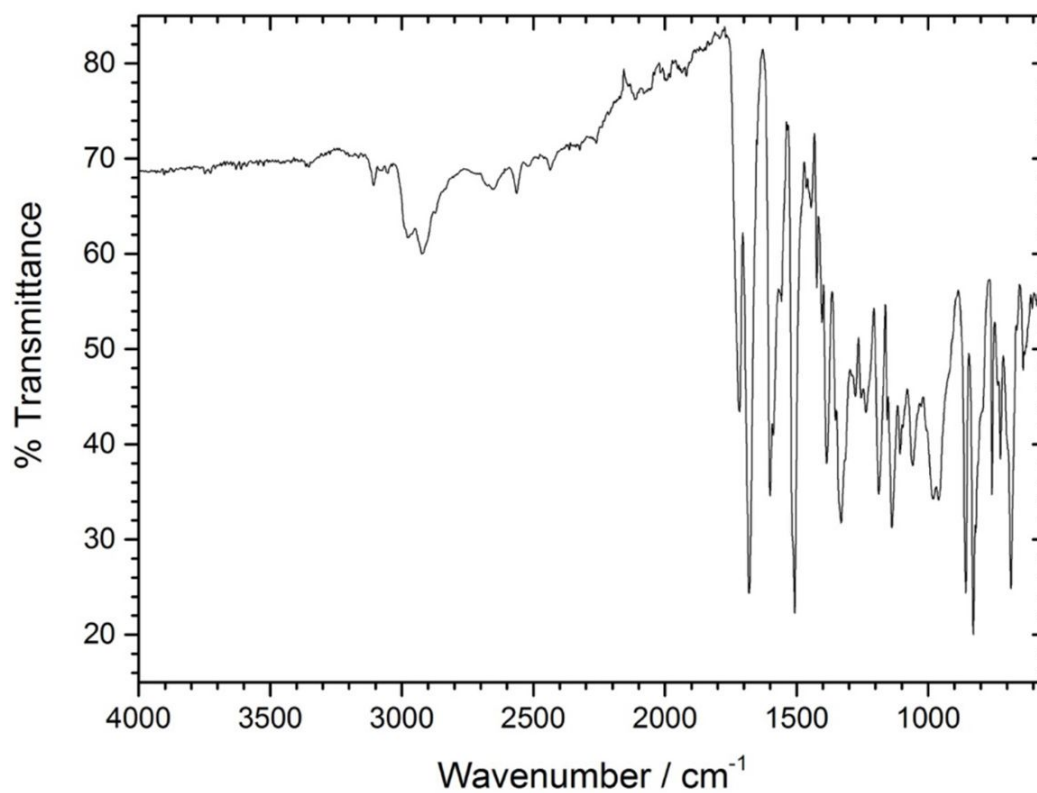

**Figure S7.** FTIR spectrum corresponding to DR1 tris(3-mercaptopropionate).

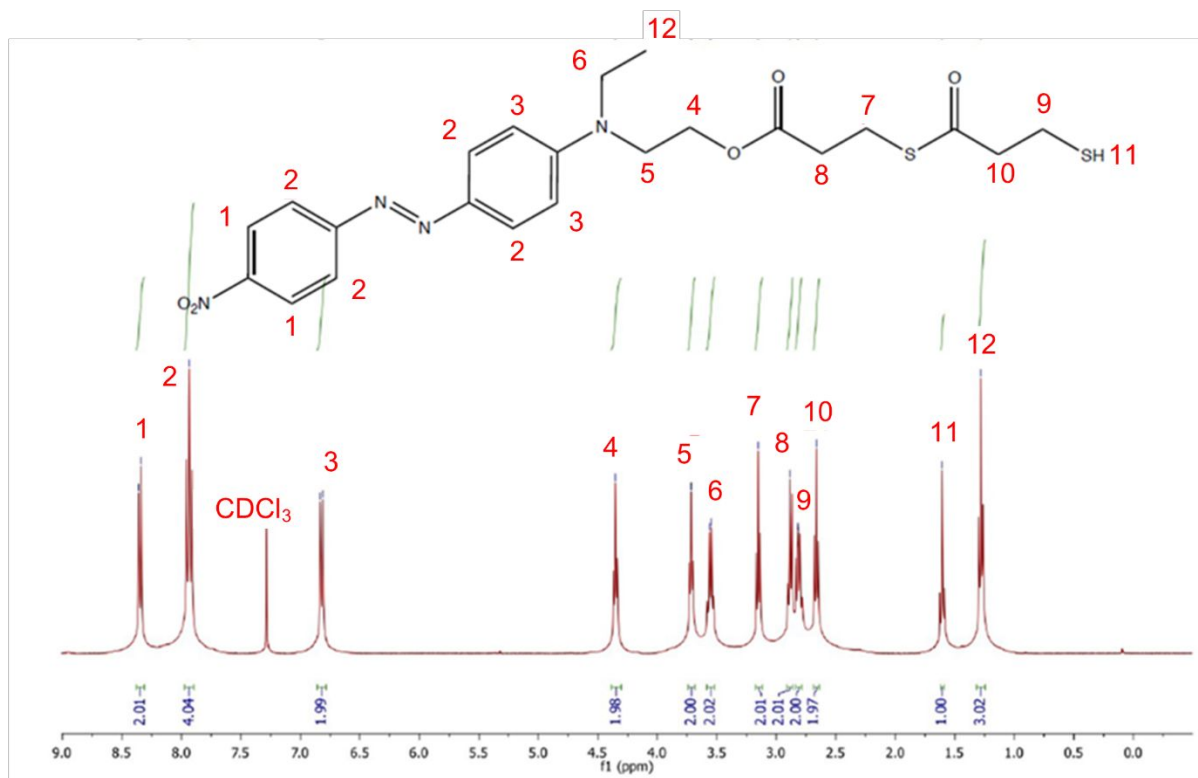

**Figure S8.** <sup>1</sup>H NMR spectrum corresponding to DR1 bis(3-mercaptopropionate) (400 MHz, CDCl<sub>3</sub>).

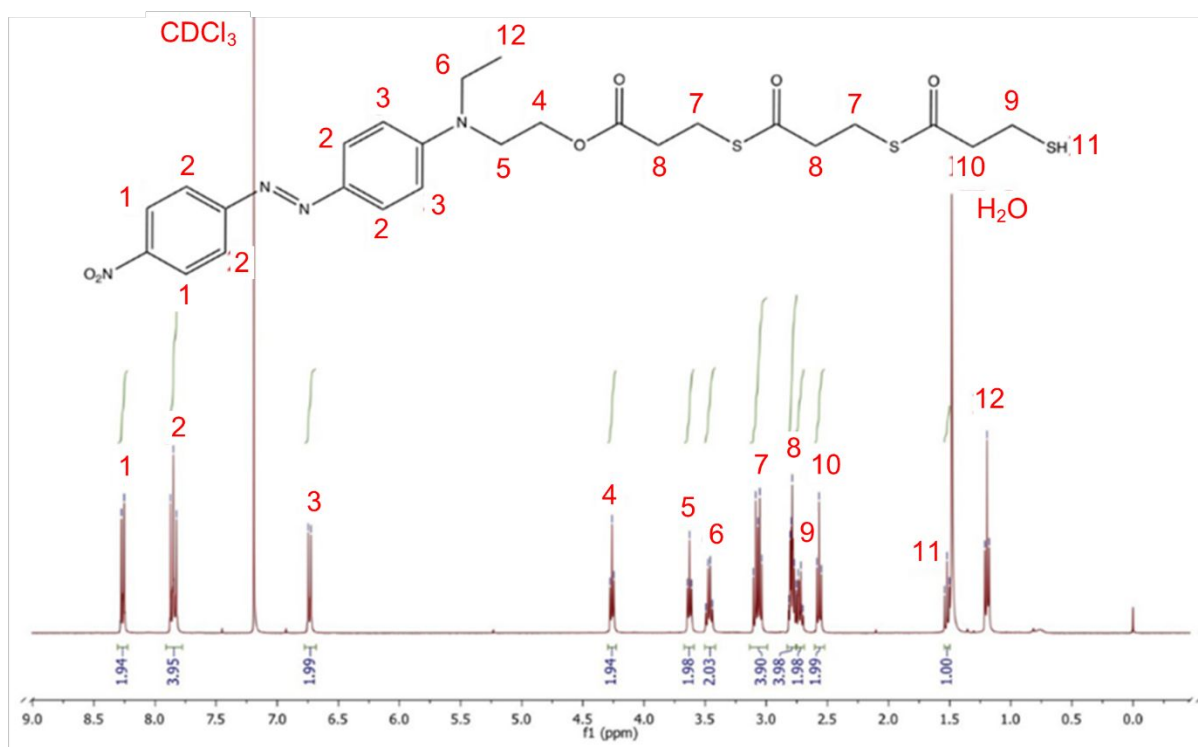

**Figure S9.**  $^1\text{H}$  NMR spectrum corresponding to DR1 tris(3-mercaptopropionate) (400 MHz,  $\text{CDCl}_3$ ).

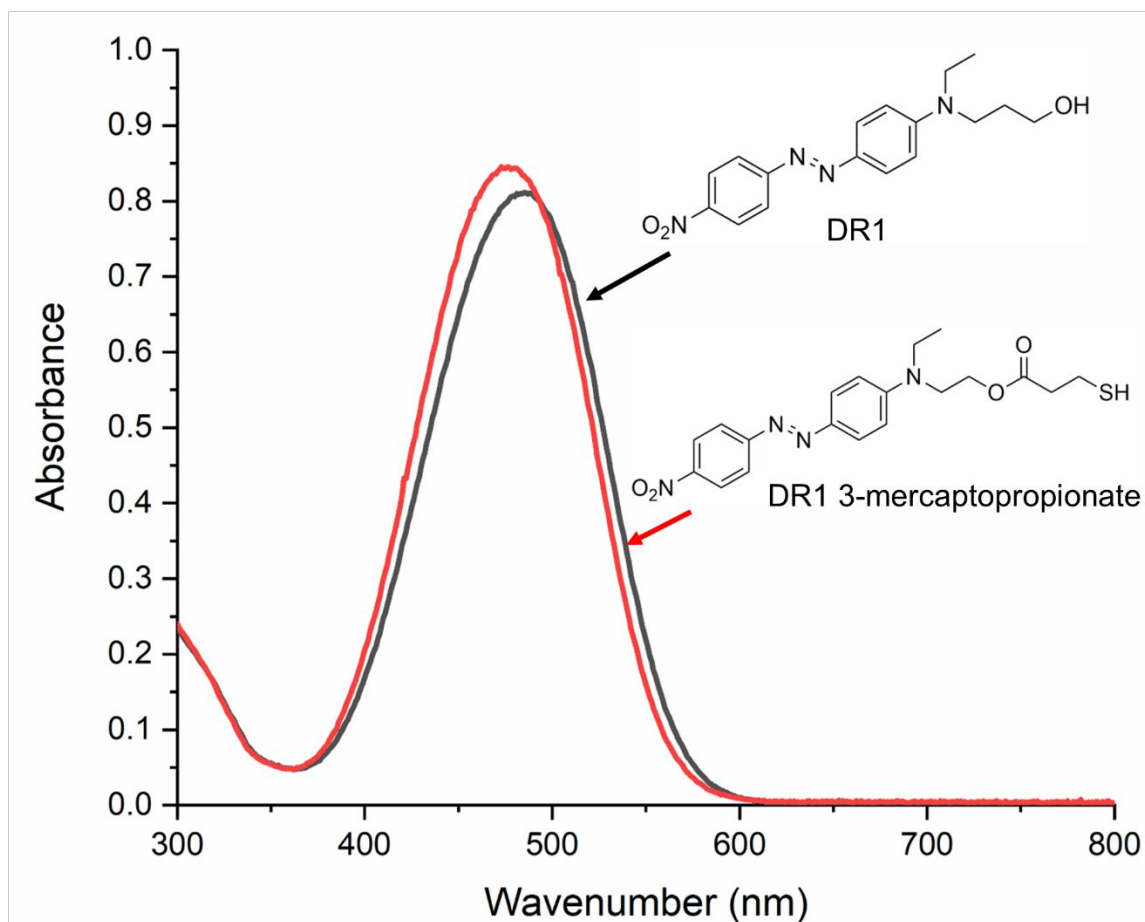

**Figure S10.** UV-vis absorption spectra of DR1 and DR1 3-mercaptopropionate.

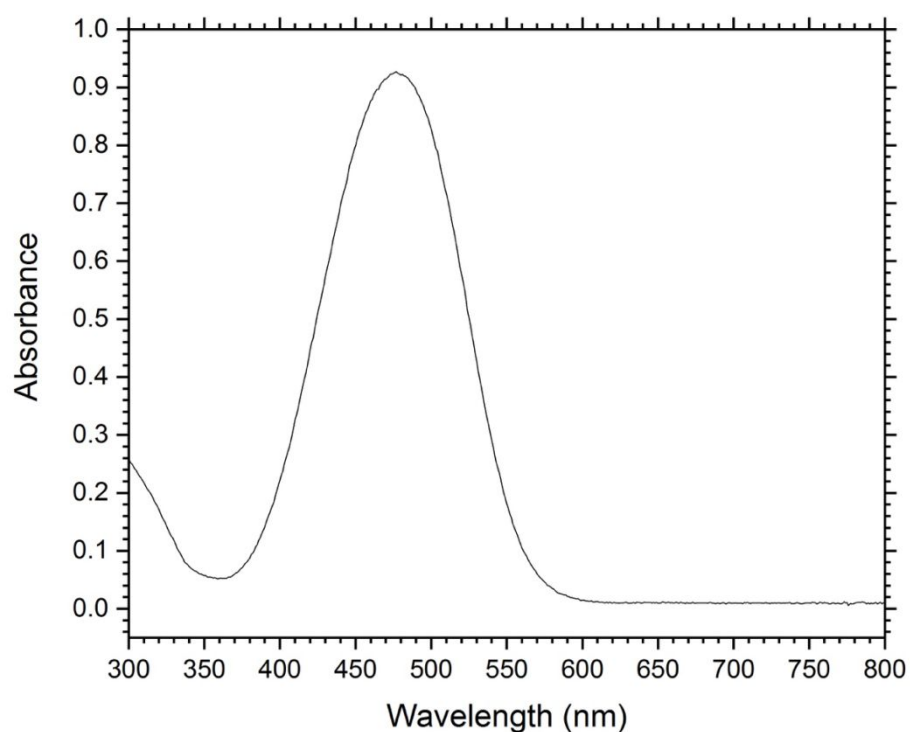

**Figure S11.** UV-vis absorption spectrum of DR1 bis(3-mercaptopropionate).

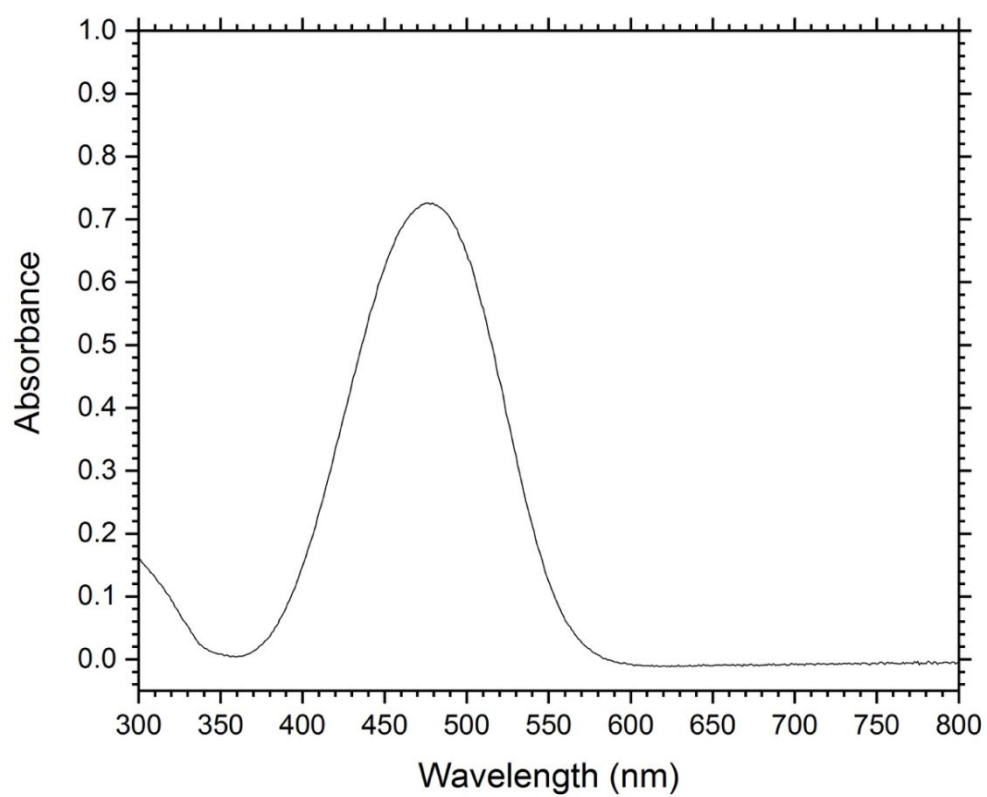

**Figure S12.** UV-vis absorption spectrum of DR1 tris(3-mercaptopropionate).



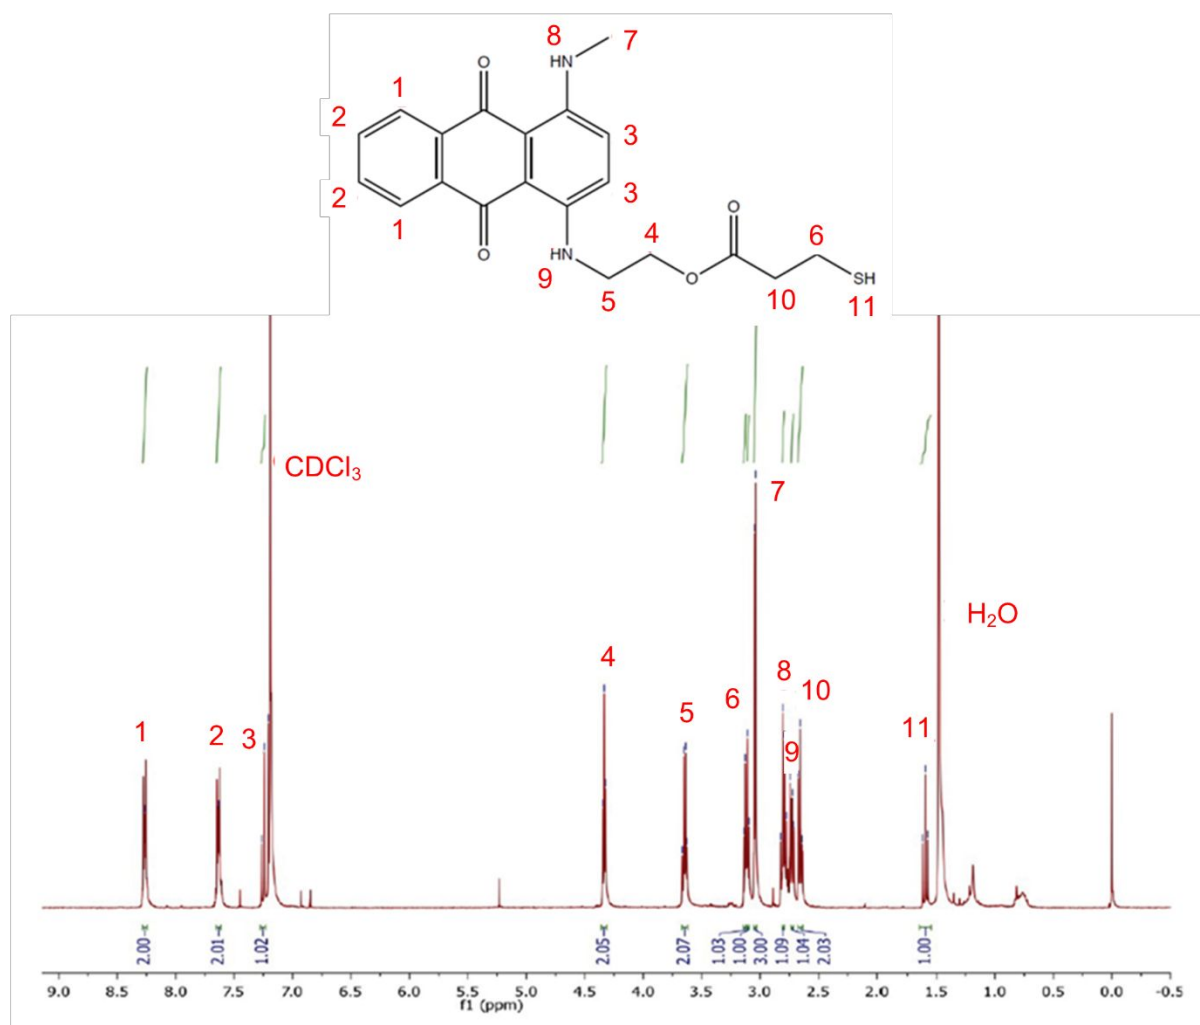

**Figure S13.** <sup>1</sup>H NMR spectrum corresponding to DB3 3-mercaptopropionate (400 MHz, CDCl<sub>3</sub>).

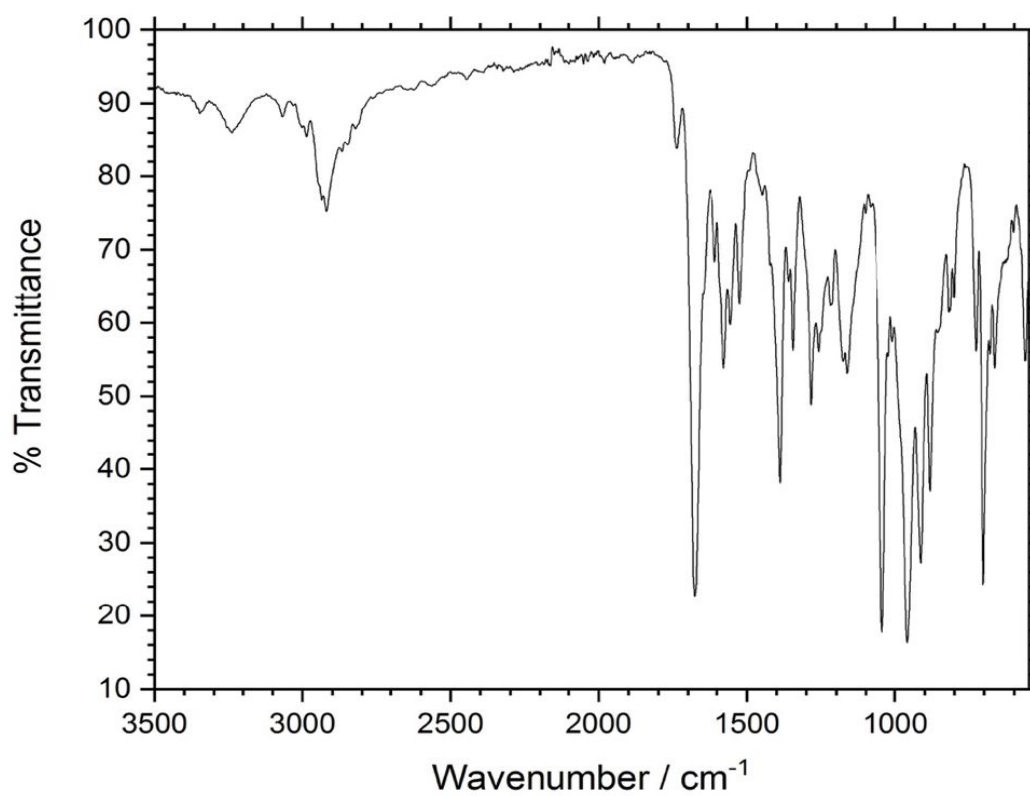

**Figure S14.** FTIR spectrum corresponding to DB3 3-mercaptopropionate.

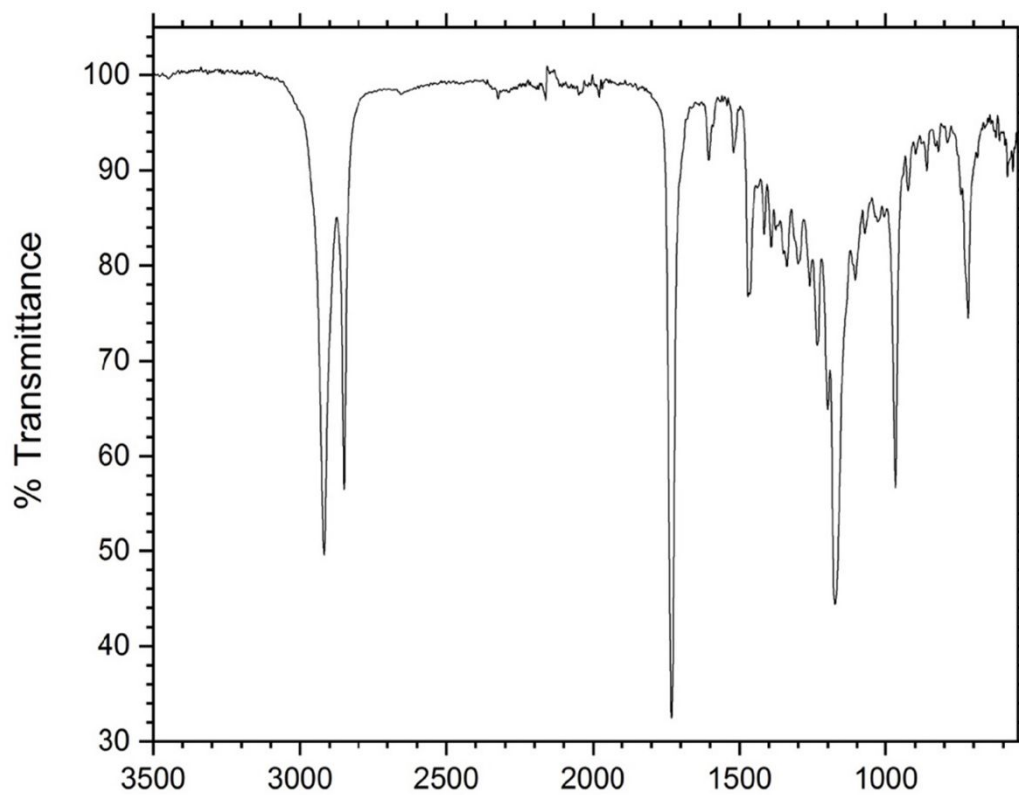

**Figure S15.** FTIR spectrum corresponding to DR1 3-mercaptopropionate dyed PGL.

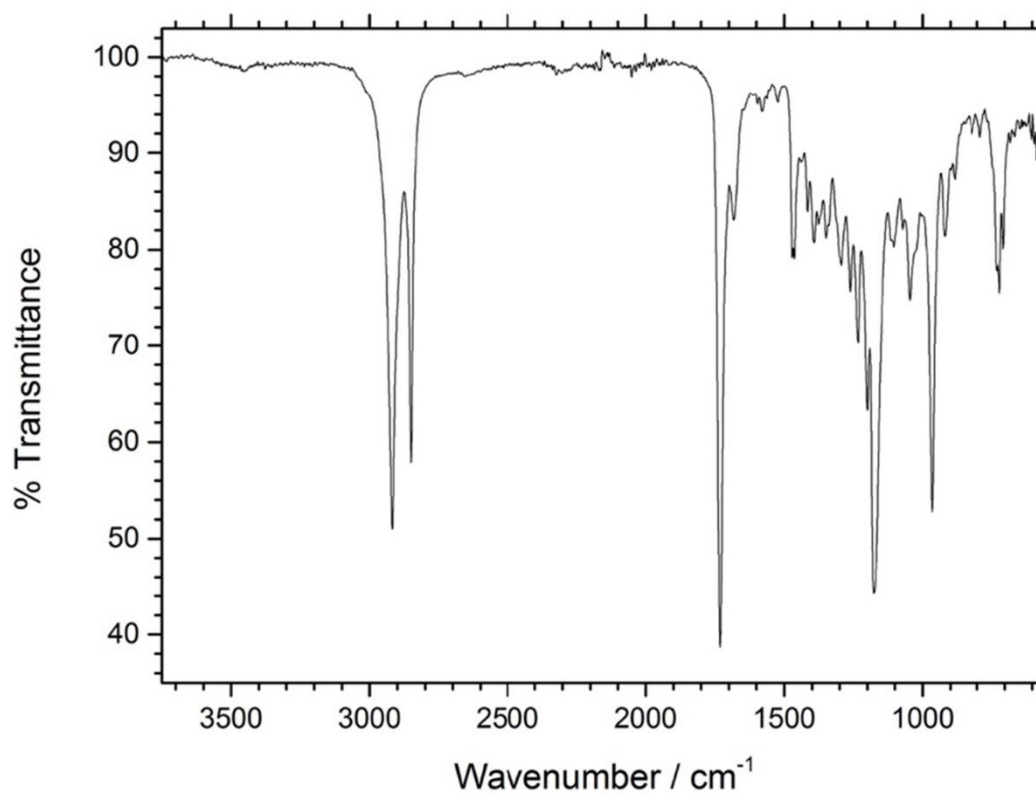

**Figure S16.** The FTIR spectrum corresponding to DB3 3-mercaptopropionate dyed PGI.

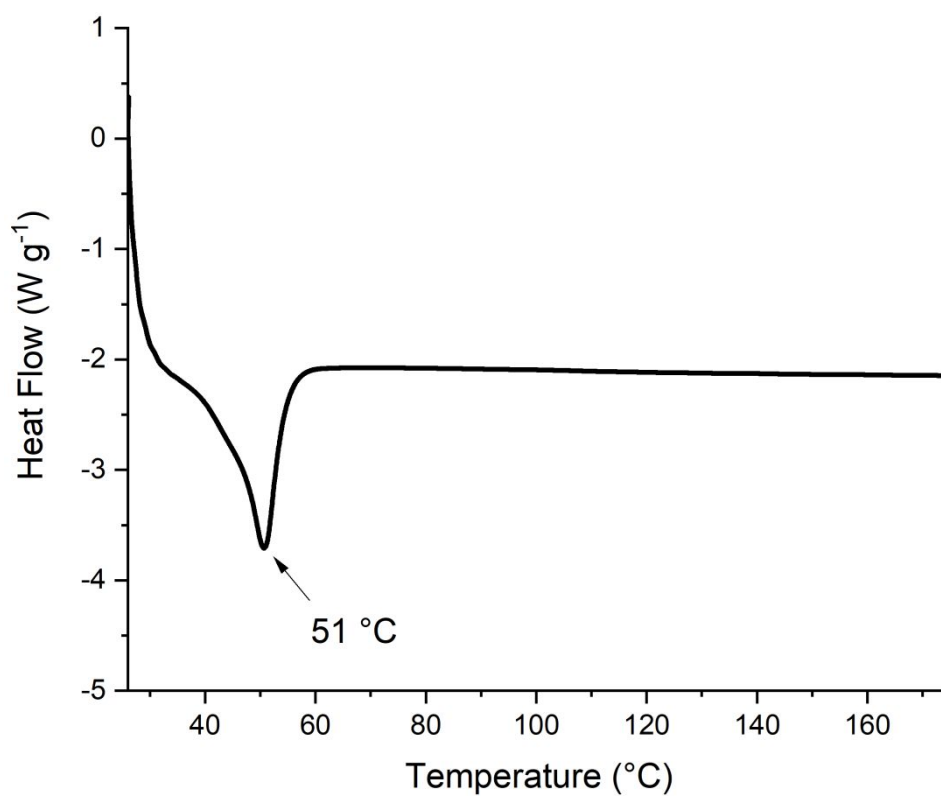

**Figure S17.** DSC thermogram for DR1 3-mercaptopropionate dyed PGI.

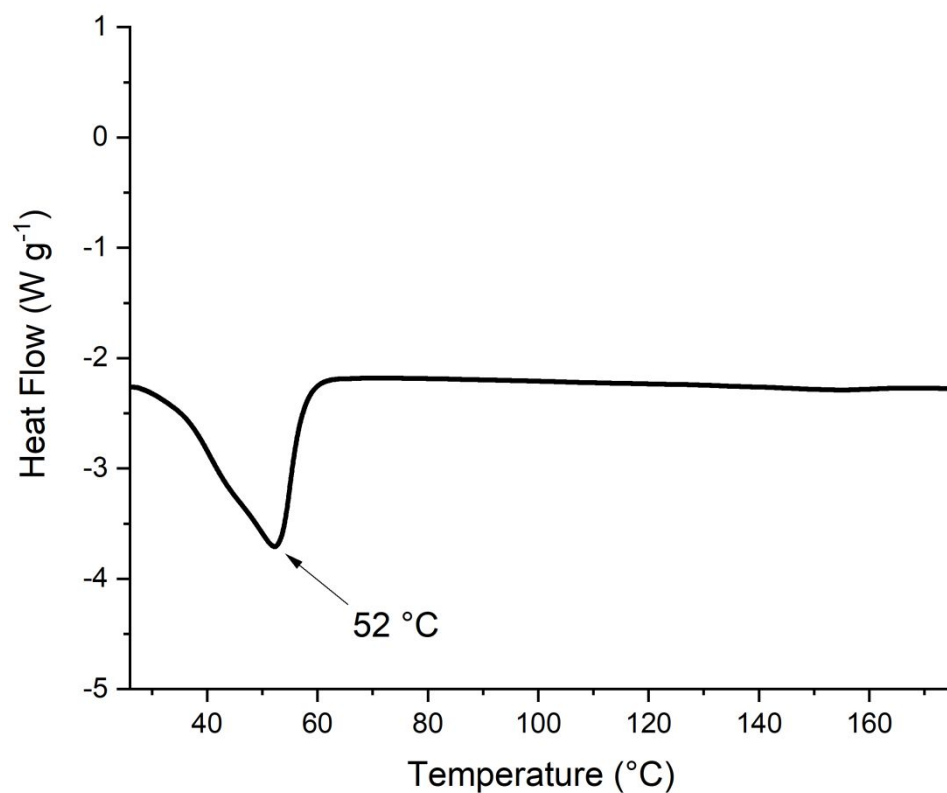

**Figure S18.** DSC thermogram for DB3 3-mercaptopropionate dyed PGI.

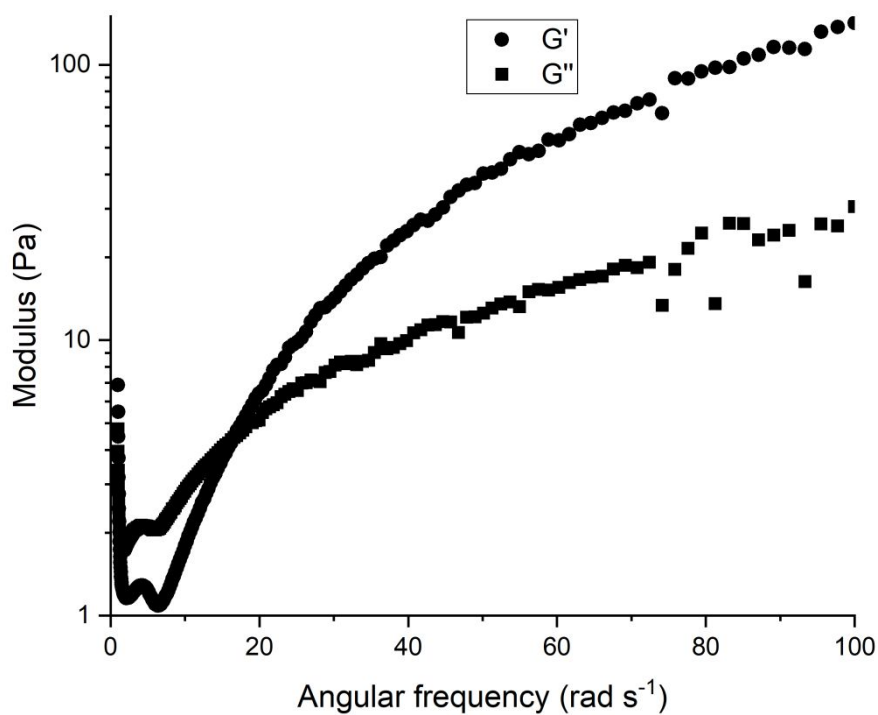

**Figure S19.** Elastic ( $G'$ ) and viscous modulus ( $G''$ ) against angular frequency for PGI swollen in 2-phenylethanol.

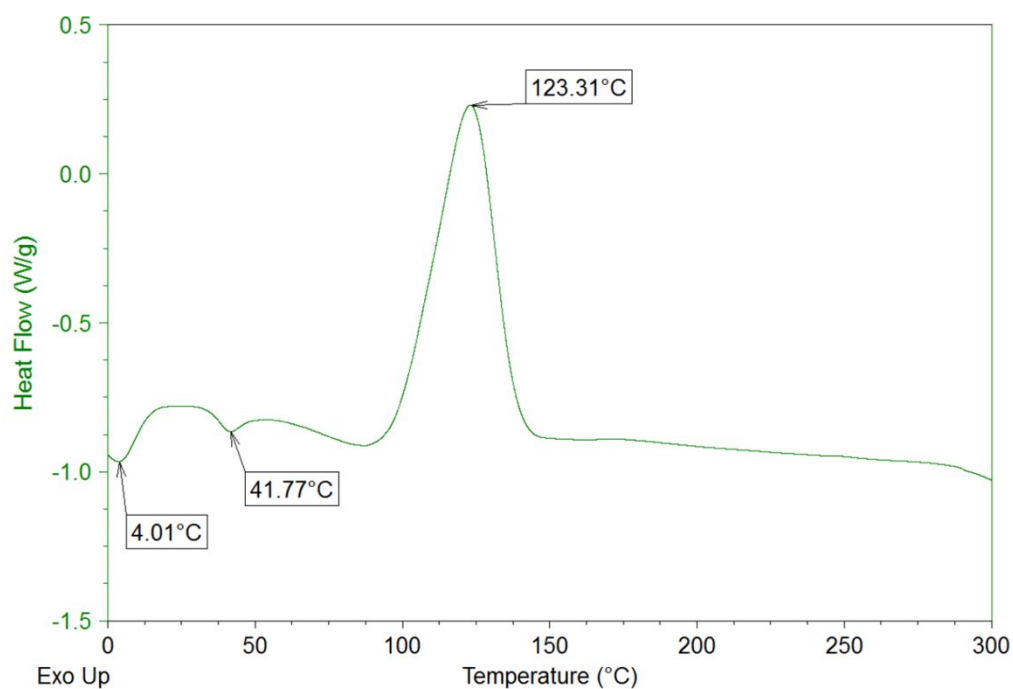

**Figure S20.** DSC thermogram for PGI crosslinked with 2,2'-(ethylenedioxy)diethanethiol.

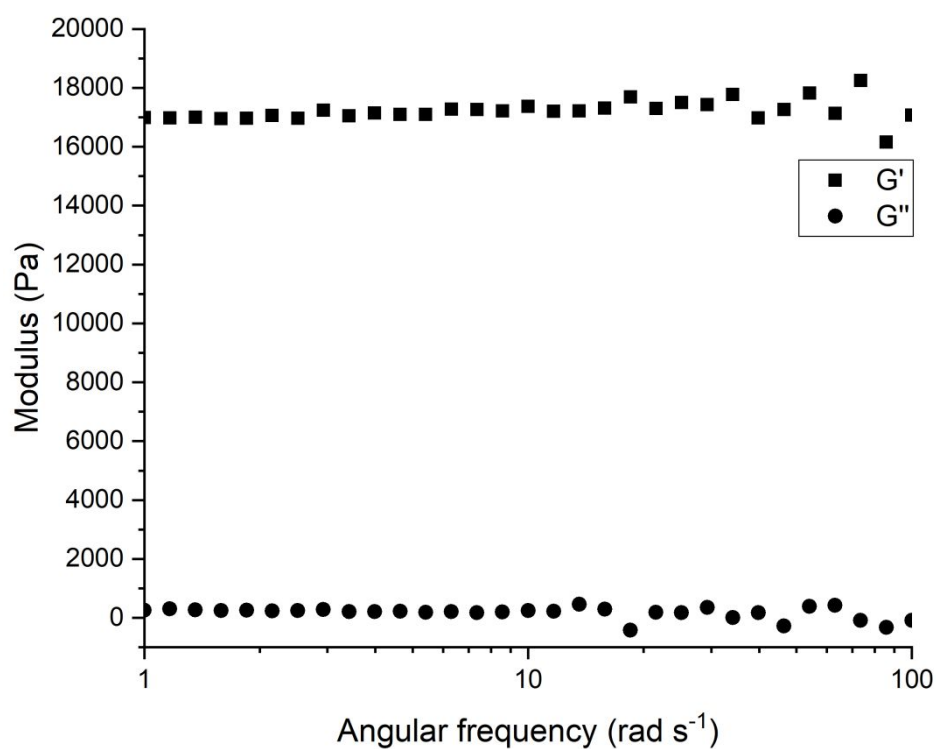

**Figure S21.** Average (n=6) elastic (G') and viscous modulus (G'') against angular frequency for PGI crosslinked with 2,2'-(ethylenedioxy)diethanethiol and swollen in 2-phenylethanol.

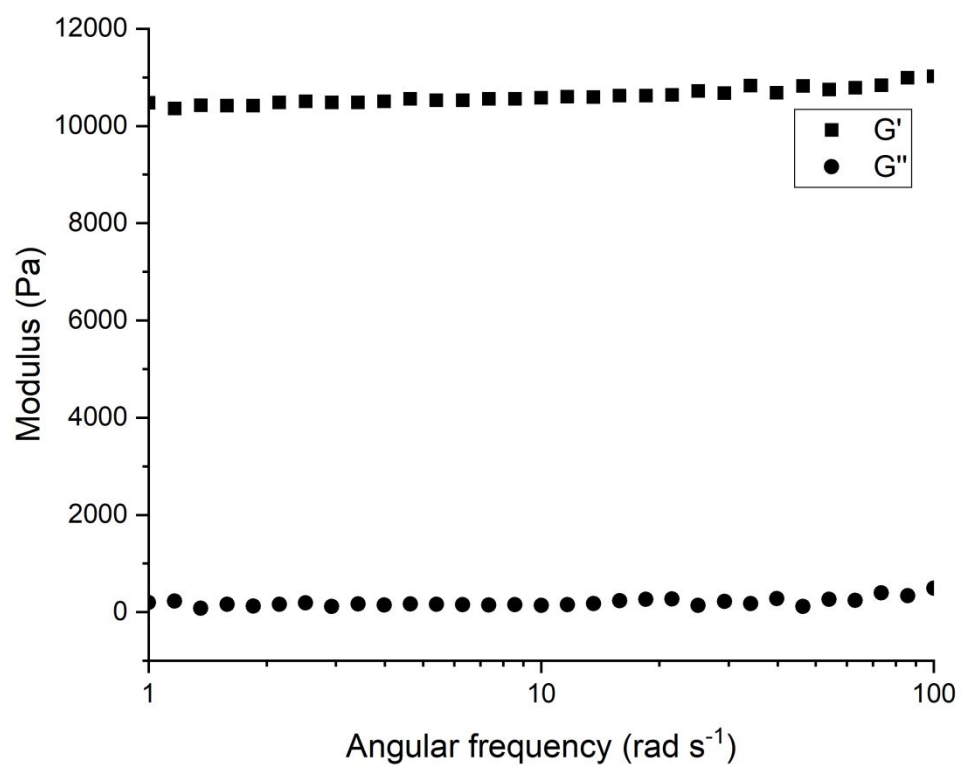

**Figure S22.** Average ( $n=7$ ) elastic ( $G'$ ) and viscous modulus ( $G''$ ) against angular frequency for PGI crosslinked with 2,2'-(ethylenedioxy)diethanethiol, covalently dyed with DB3 3-mercaptopropionate and swollen in 2-phenylethanol.
